# Supplementary material for: Pyrolysis-assisted catalytic conversion of wood in hot-compressed water for the production of aromatic monomers and syngas without external hydrogen addition
Source: Royal Society of Chemistry journal article supplement (doi:10.1039/d6ra00940a), 2026-05-18
Supplement: d6ra00940a1.pdf [file d6ra00940a1.pdf]

## Pyrolysis-assisted catalytic conversion of wood in hot-compressed water for the production of aromatic monomers and syngas without external hydrogen addition

Alex Ikeda-Francisco<sup>a</sup>, Jiaqi Wang<sup>a</sup>, Eiji Minami<sup>a</sup> and Haruo Kawamoto<sup>\*a</sup>

<sup>a</sup> Department of Socio-Environmental Energy Science, Graduate School of Energy Science, Kyoto University, Yoshidahonmachi, Sakyo-ku, Kyoto 606-8501, Japan.

\*Corresponding author. E-mail: [kawamoto@energy.kyoto-u.ac.jp](mailto:kawamoto@energy.kyoto-u.ac.jp) (Haruo Kawamoto).

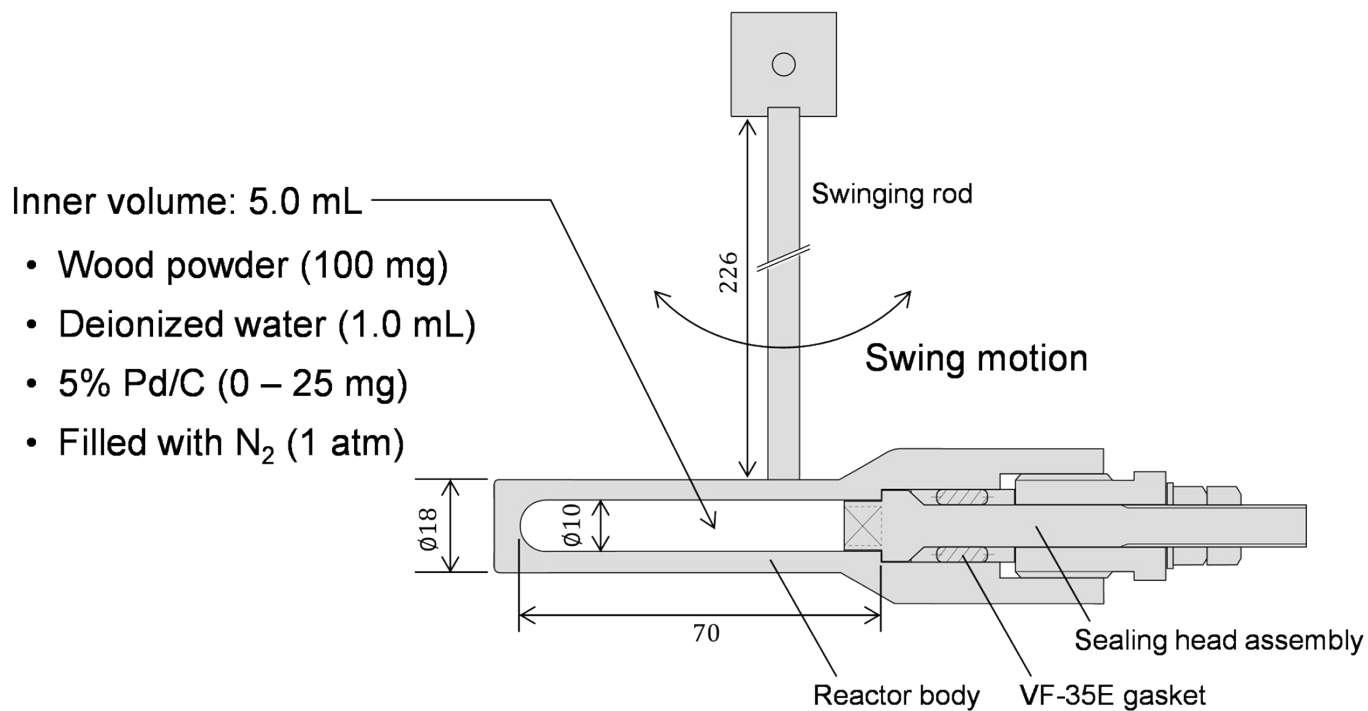

**Fig. S1** Schematic diagram of the Inconel 625 batch reactor used for the conversion.

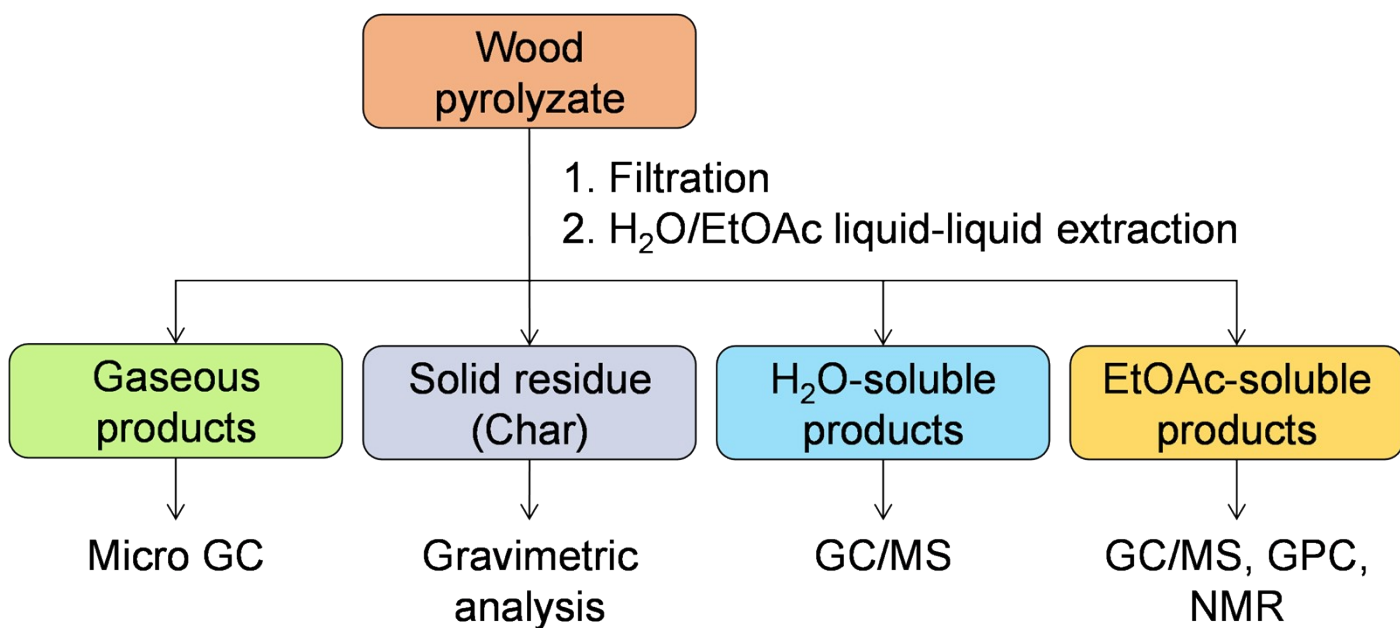

**Fig. S2** Fractionation and analytical methods of the products.

**Table S1** Yields of solid residue (char), gaseous products and lignin-derived monomers from wood at various pyrolysis conditions.

| Reaction conditions |                     |                    |                  |                     | Japanese beech       |                    |                      | Japanese cedar       |                    |                      |
|---------------------|---------------------|--------------------|------------------|---------------------|----------------------|--------------------|----------------------|----------------------|--------------------|----------------------|
| Temperature (°C)    | Reaction time (min) | Pd/C catalyst (mg) | Solvent          | Solvent volume (mL) | Solid residue (wt.%) | Gas yield (C-mol%) | Monomer yield (mol%) | Solid residue (wt.%) | Gas yield (C-mol%) | Monomer yield (mol%) |
| 300                 | 60                  | 25                 | H <sub>2</sub> O | 1                   | 4.1                  | 40.9               | 69.7                 | 8.9                  | 28.9               | 42.9                 |
| 350                 | 60                  | 25                 | H <sub>2</sub> O | 1                   | 0.9                  | 43.6               | 70.0                 | 4.8                  | 36.7               | 51.2                 |
| 375                 | 60                  | 25                 | H <sub>2</sub> O | 1                   | 4.9                  | 46.3               | 77.1                 | 7.4                  | 41.0               | 58.0                 |
| 400                 | 60                  | 25                 | H <sub>2</sub> O | 1                   | 6.0                  | 43.9               | 68.9                 | 1.8                  | 48.0               | 59.4                 |
| 450                 | 60                  | 25                 | H <sub>2</sub> O | 1                   | 10.4                 | 58.0               | 23.1                 | ND*                  | 53.6               | 46.3                 |
| 350                 | 60                  | 0                  | H <sub>2</sub> O | 1                   | 6.3                  | 14.3               | 39.8                 | 13.3                 | 9.6                | 20.3                 |
| 350                 | 5                   | 25                 | H <sub>2</sub> O | 1                   | 4.6                  | 23.2               | 43.0                 | 4.7                  | 43.2               | 29.4                 |
| 350                 | 15                  | 25                 | H <sub>2</sub> O | 1                   | 2.6                  | 51.8               | 44.6                 | 12.6                 | 48.4               | 34.0                 |
| 350                 | 30                  | 25                 | H <sub>2</sub> O | 1                   | ND                   | 41.4               | 76.1                 | 6.7                  | 47.2               | 51.5                 |
| 400                 | 5                   | 25                 | H <sub>2</sub> O | 1                   | 1.5                  | 30.4               | 66.7                 | 3.4                  | 31.3               | 38.3                 |
| 400                 | 15                  | 25                 | H <sub>2</sub> O | 1                   | 5.4                  | 27.3               | 74.3                 | 3.3                  | 36.3               | 42.3                 |
| 400                 | 30                  | 25                 | H <sub>2</sub> O | 1                   | 6.7                  | 35.5               | 69.3                 | ND                   | 35.2               | 50.2                 |
| 350                 | 60                  | 25                 | H <sub>2</sub> O | 2                   | 1.9                  | 35.4               | 81.6                 | -                    | -                  | -                    |
| 400                 | 60                  | 25                 | H <sub>2</sub> O | 2                   | 1.2                  | 38.5               | 50.6                 | -                    | -                  | -                    |
| 450                 | 5                   | 25                 | H <sub>2</sub> O | 1                   | 8.8                  | 60.6               | 55.9                 | ND                   | 60.5               | 57.7                 |
| 300                 | 5                   | 25                 | H <sub>2</sub> O | 1                   | 8.0                  | 33.6               | 23.1                 | 9.6                  | 34.2               | 25.7                 |

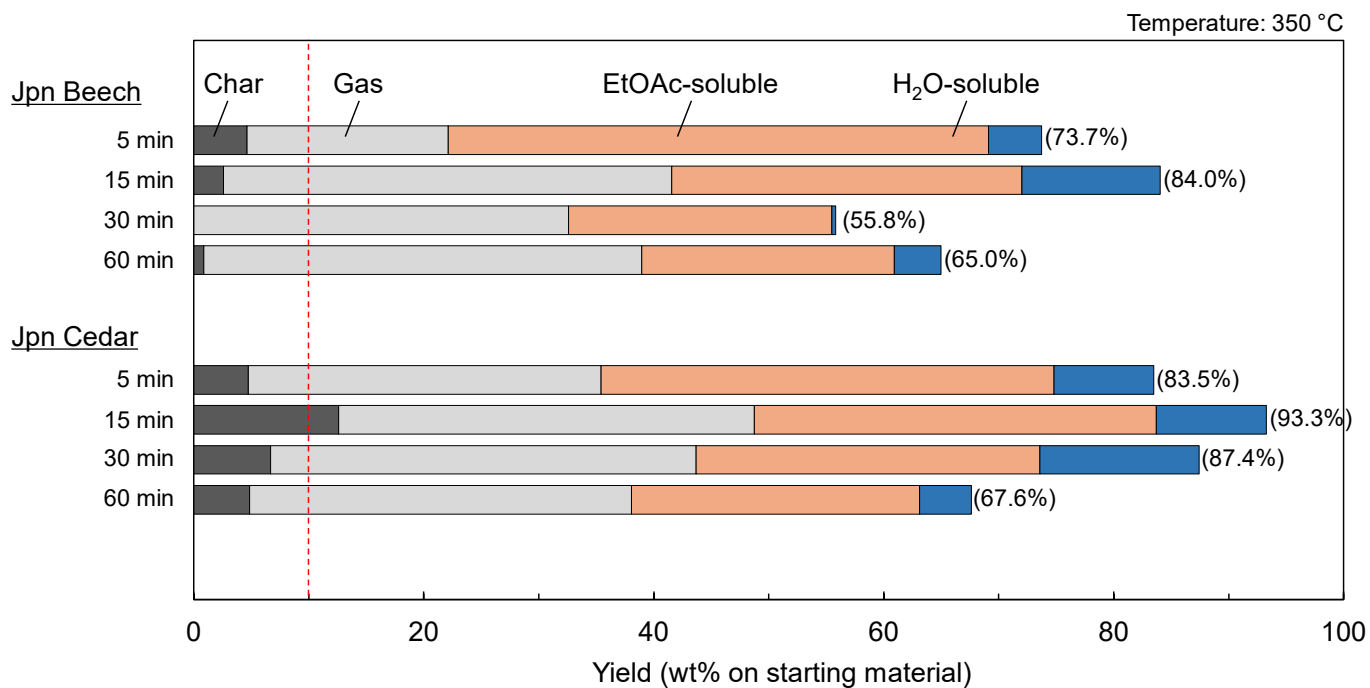

**Fig. S3** Yields of char, gas, EtOAc-soluble and water-soluble products from Japanese beech and Japanese cedar (100 mg) treated at 350 °C for various reaction times in H<sub>2</sub>O (1 mL) under N<sub>2</sub> (1 atm, prior to heating) over Pd/C (25 mg). Values in parentheses indicate the total yield of the products.

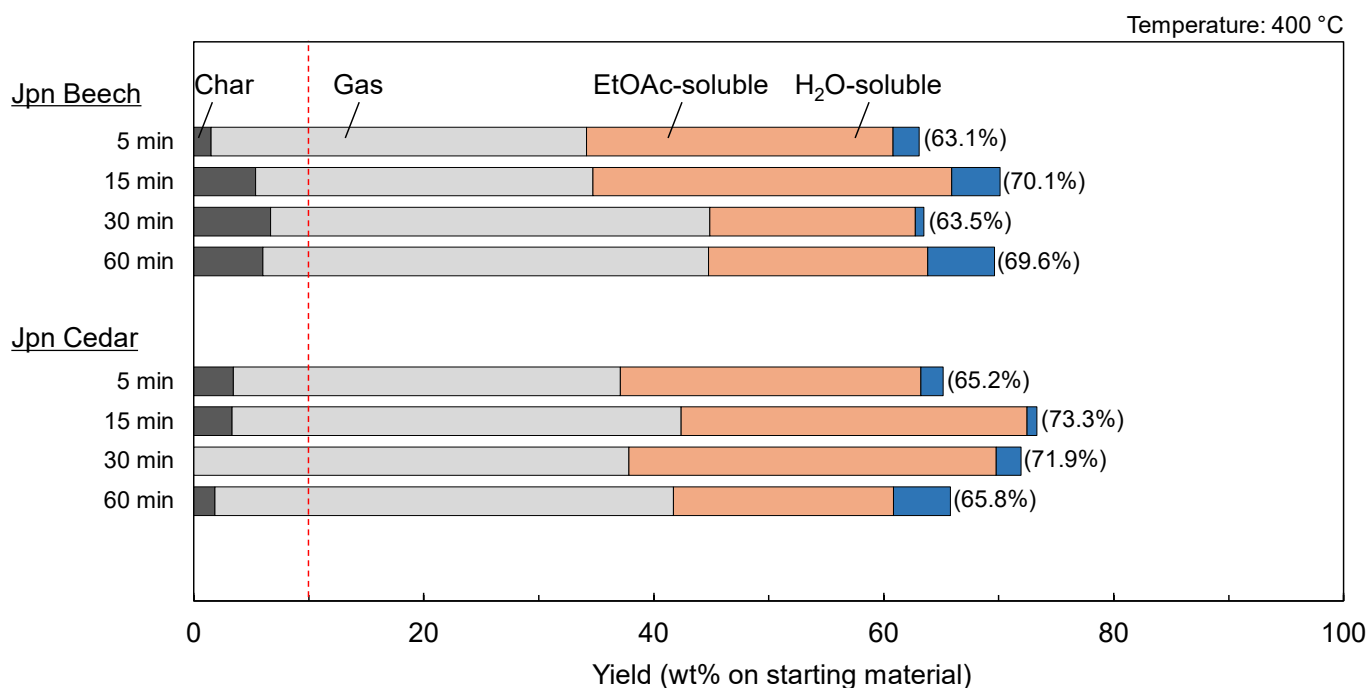

**Fig. S4** Yields of char, gas, EtOAc-soluble and water-soluble products from Japanese beech and Japanese cedar (100 mg) treated at 400 °C for various reaction times in H<sub>2</sub>O (1 mL) under N<sub>2</sub> (1 atm, prior to heating) over Pd/C (25 mg). Values in parentheses indicate the total yield of the products.

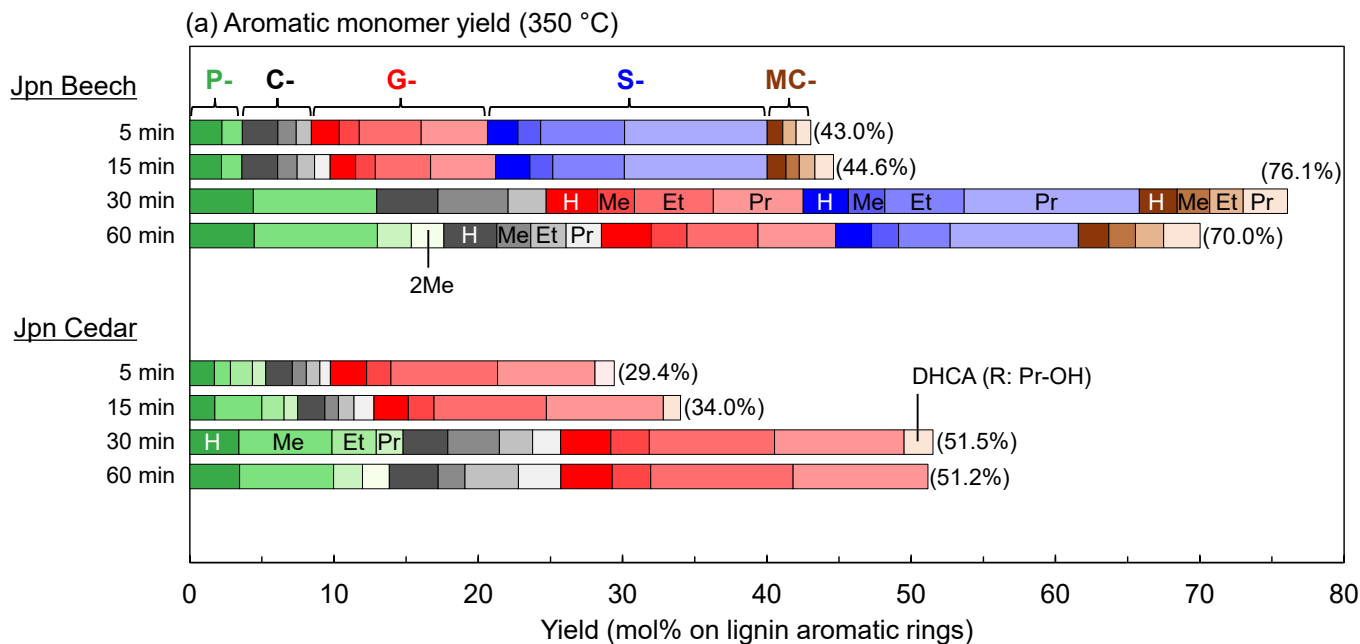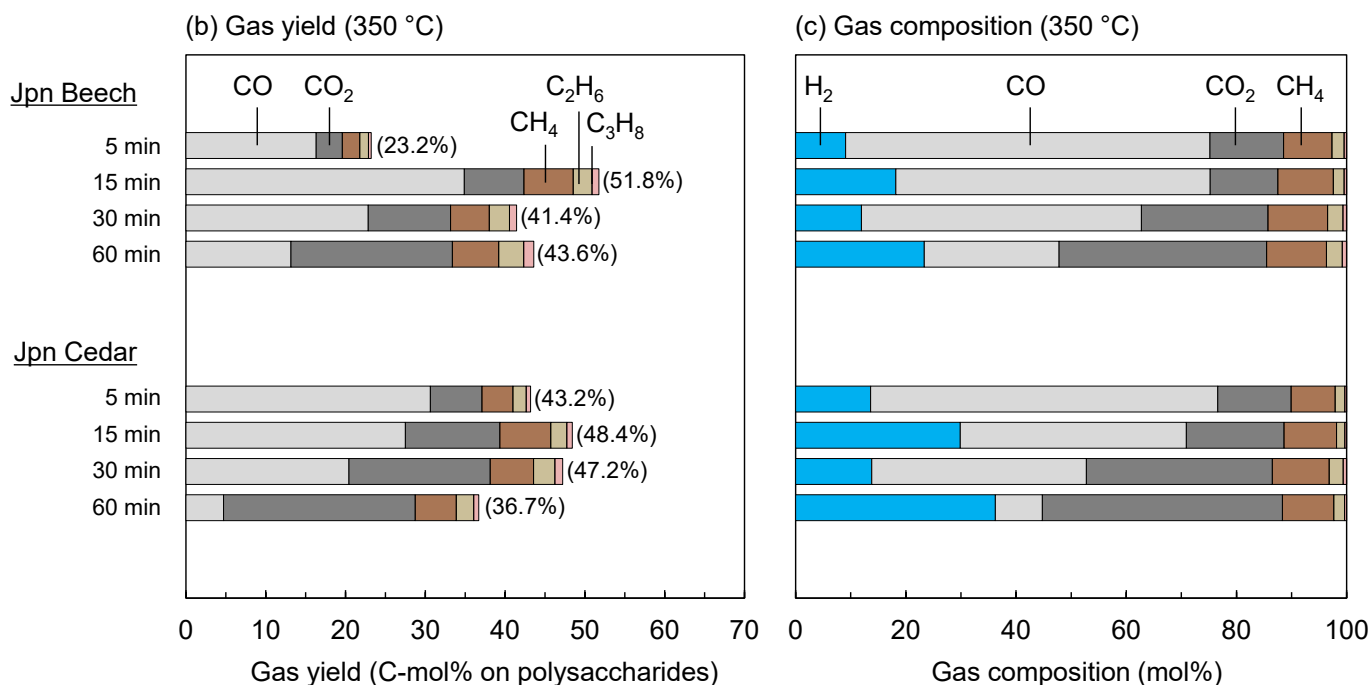

**Fig. S5** Yields of (a) aromatic monomers, (b) gaseous products, and (c) gas composition from Japanese beech and Japanese cedar (100 mg) treated at 350 °C for various reaction times in H<sub>2</sub>O (1 mL) under N<sub>2</sub> (1 atm, prior to heating) over Pd/C (25 mg). Values in parentheses indicate the total yield of aromatic monomers or gases.

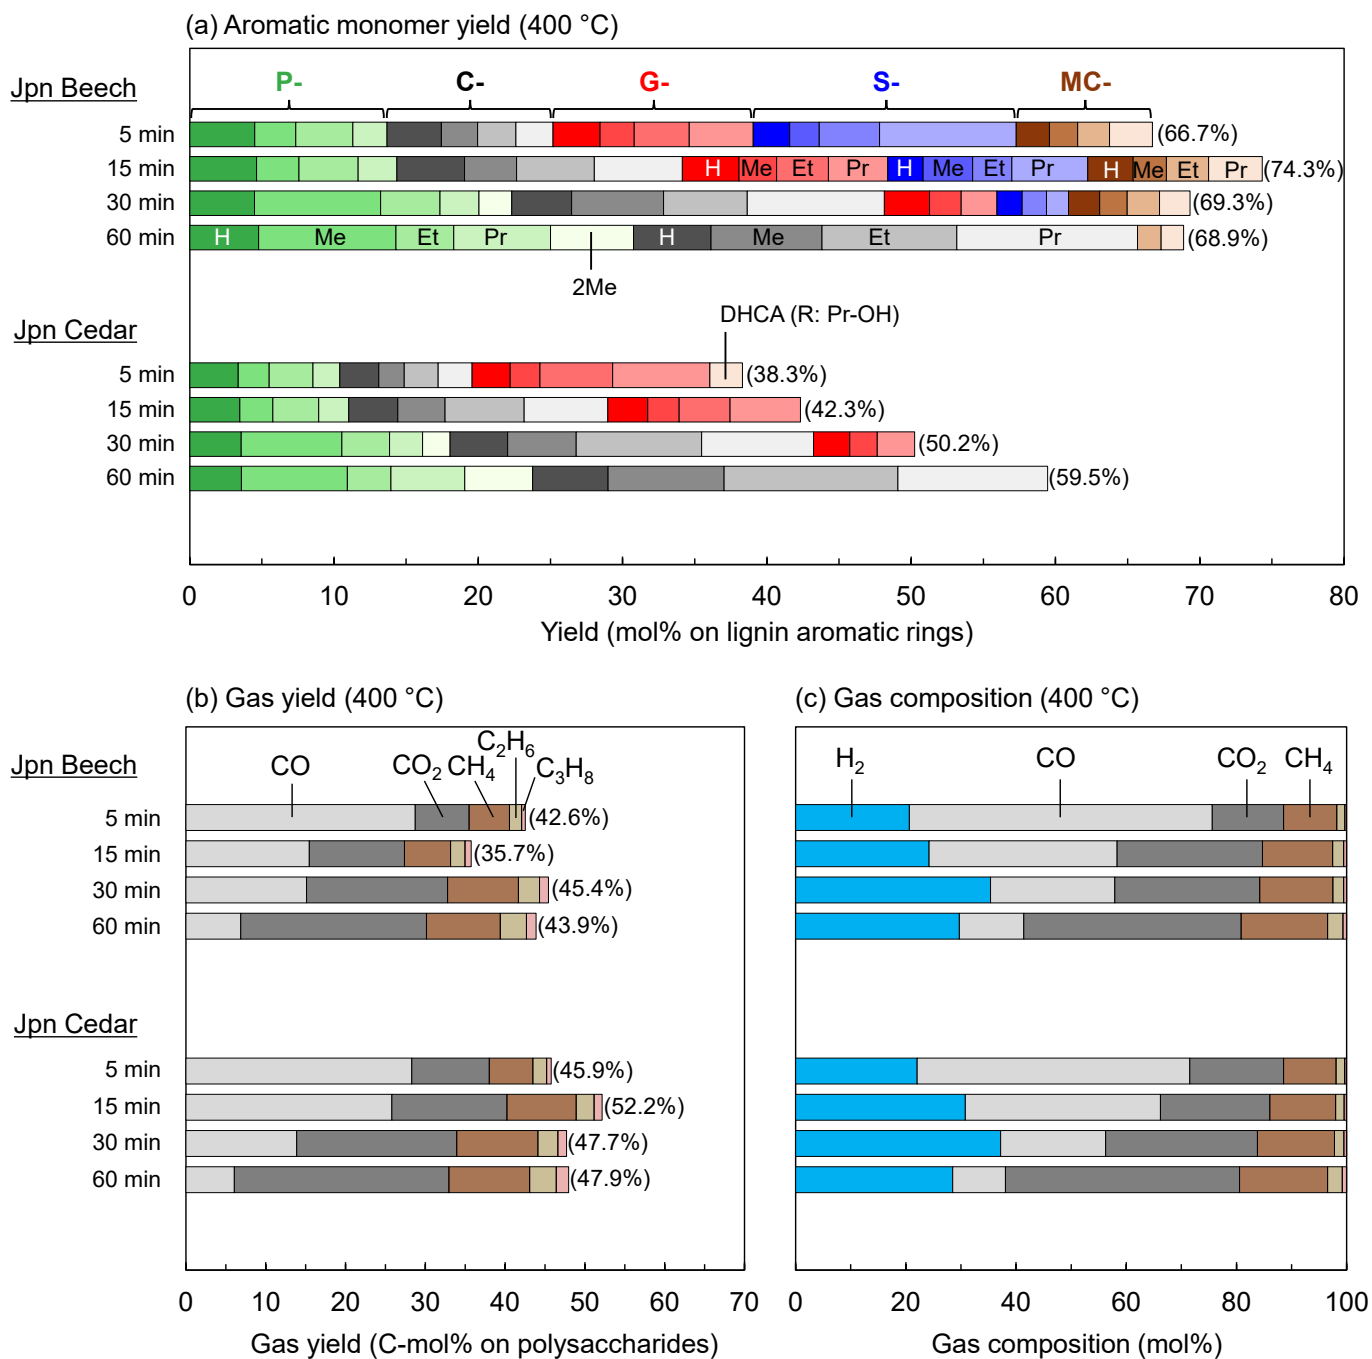

**Fig. S6** Yields of (a) aromatic monomers, (b) gaseous products, and (c) gas composition from Japanese beech and Japanese cedar (100 mg) treated at 400 °C for various reaction times in H<sub>2</sub>O (1 mL) under N<sub>2</sub> (1 atm, prior to heating) over Pd/C (25 mg). Values in parentheses indicate the total yield of aromatic monomers or gases.

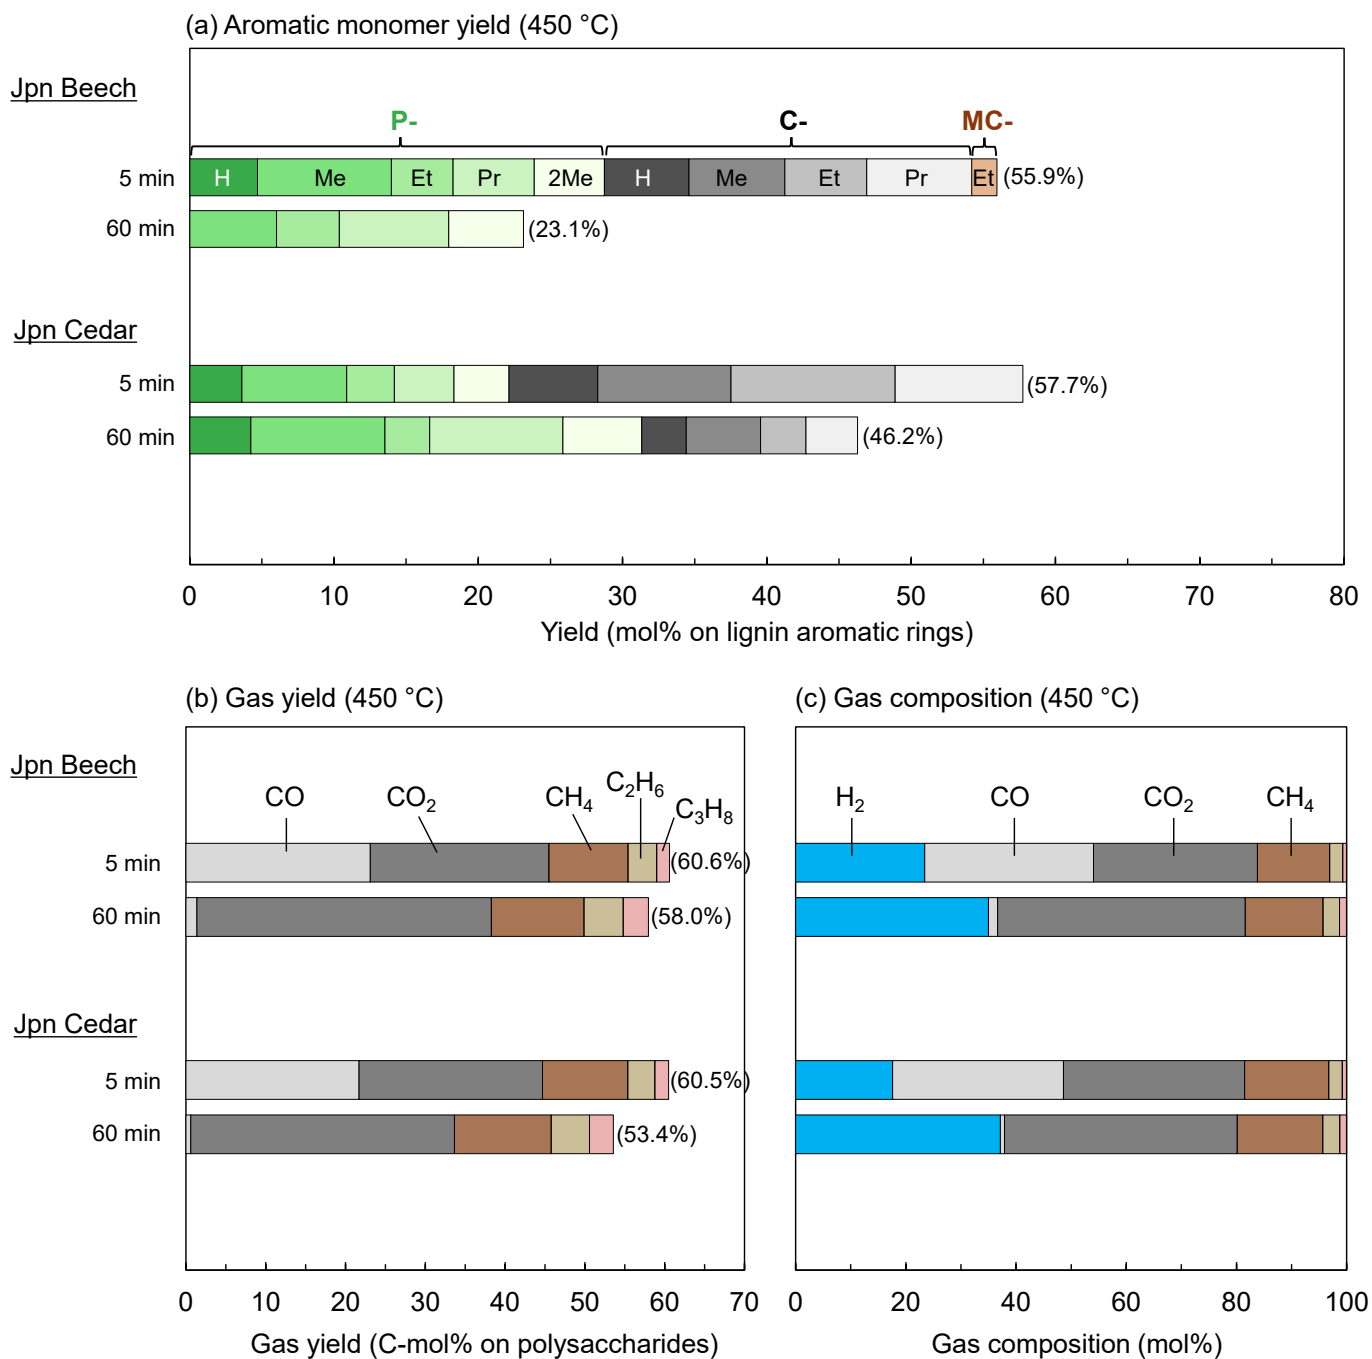

**Fig. S7** Yields of (a) aromatic monomers, (b) gaseous products, and (c) gas composition from Japanese beech and Japanese cedar (100 mg) treated at 450 °C for various reaction times in H<sub>2</sub>O (1 mL) under N<sub>2</sub> (1 atm, prior to heating) over Pd/C (25 mg). Values in parentheses indicate the total yield of aromatic monomers or gases.

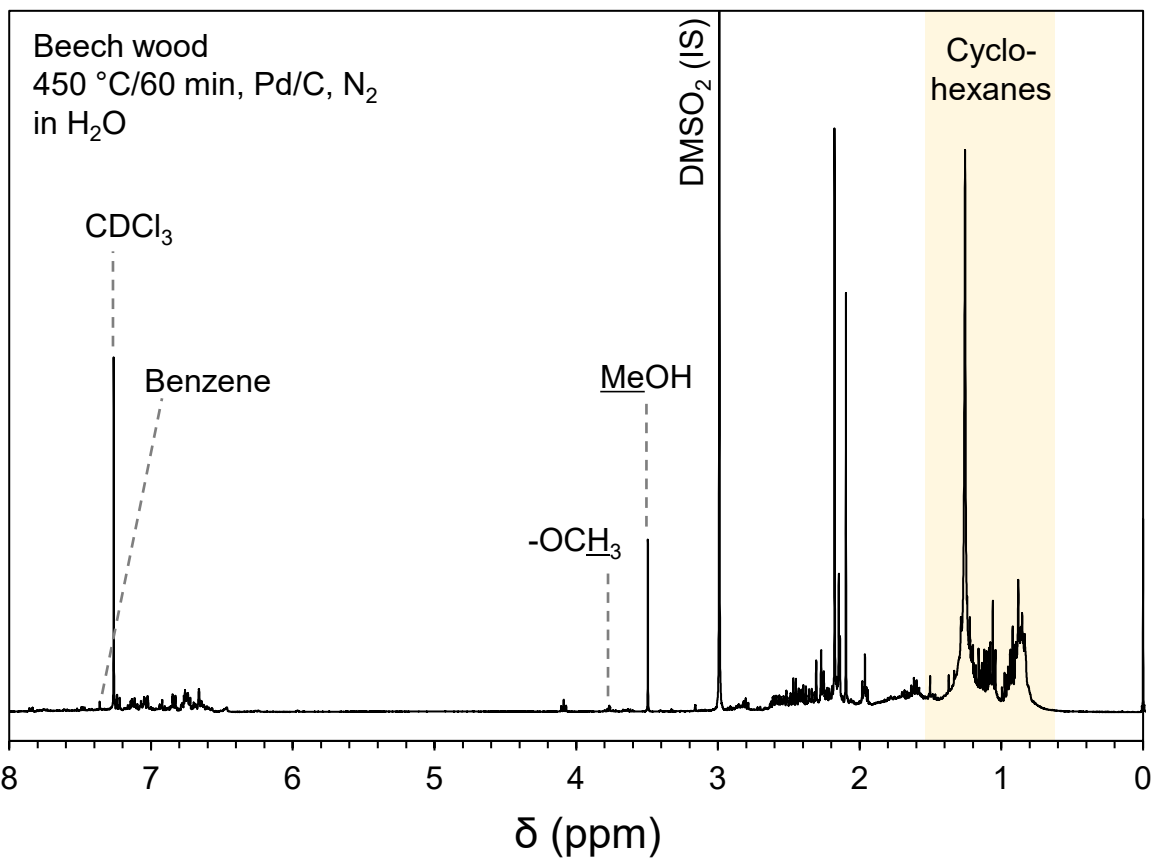

**Fig. S8** <sup>1</sup>H-NMR spectrum (400 MHz) of CDCl<sub>3</sub>-soluble products obtained from Japanese beech (100 mg) over Pd/C (25 mg) in H<sub>2</sub>O (1 mL) under N<sub>2</sub> atmosphere (1 atm, prior to heating) at 450 °C for 60 min. Internal standard (IS): dimethyl sulfone (DMSO<sub>2</sub>).

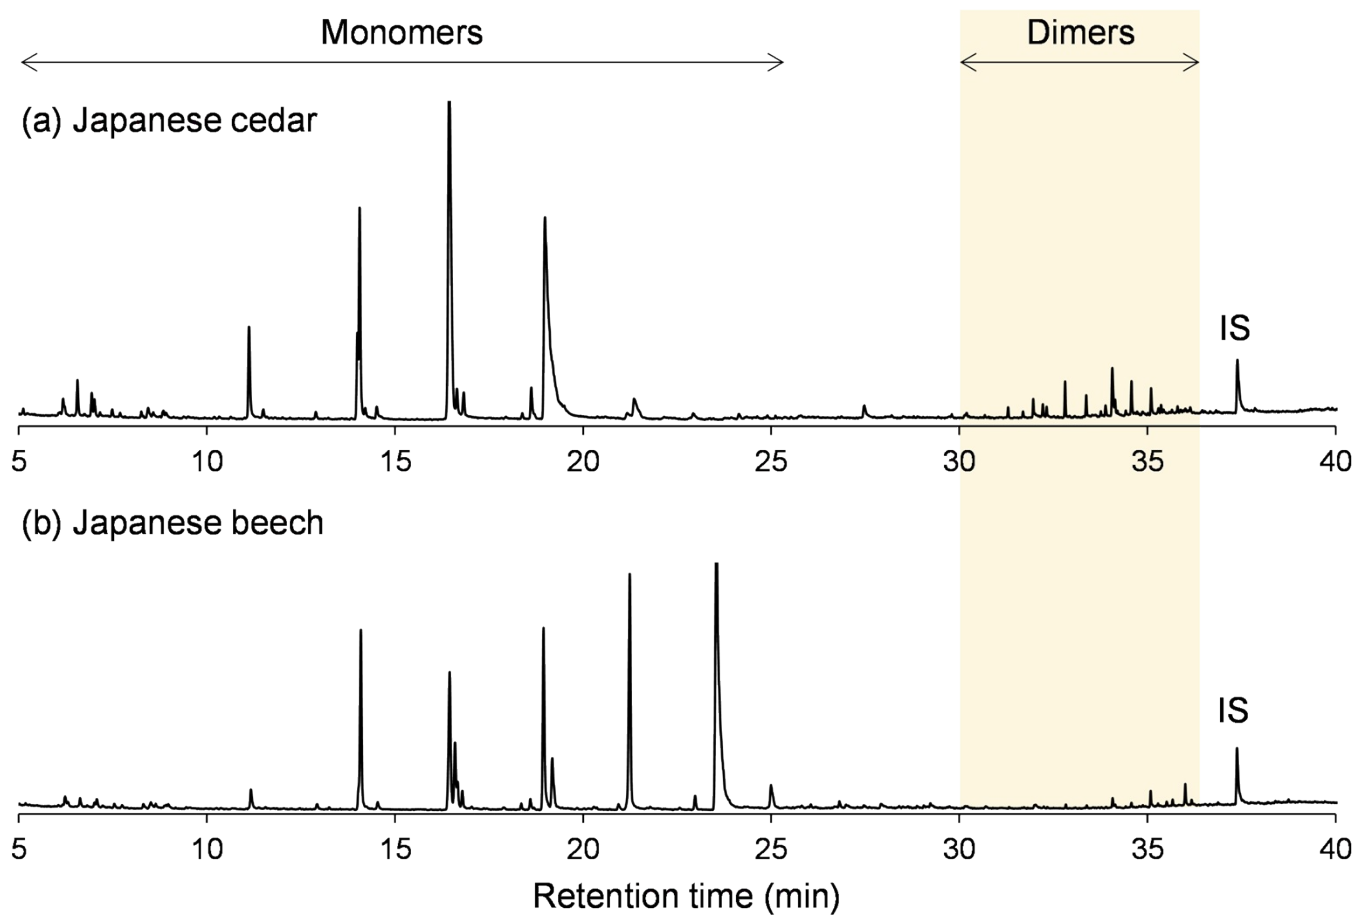

**Fig. S9** Assignment of dimeric products on the GC/MS total-ion chromatogram of EtOAc-soluble products after trimethylsilylation obtained from Japanese cedar wood (100 mg) in H<sub>2</sub>O (1 mL) under N<sub>2</sub> atmosphere (1 mL, prior to heating) over Pd/C (25 mg) at 350 °C for 5 min. Internal standard (IS): 1,3,5-triphenylbenzene.

(a) 5-5 dimers

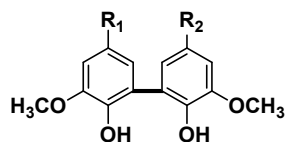

| Compound | m/z (TMS) | R <sub>1</sub> | R <sub>2</sub> |
|----------|-----------|----------------|----------------|
| 1        | 418       | Me             | Me             |
| 2        | 432       | H (Me)         | Pr (Et)        |
| 3        | 446       | Me (Et)        | Pr (Et)        |
| 4        | 460       | Et             | Pr             |
| 5        | 474       | Pr             | Pr             |

(b) Diarylethanes

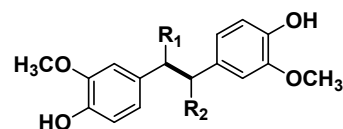

| Compound | m/z (TMS) | R <sub>1</sub> | R <sub>2</sub> |
|----------|-----------|----------------|----------------|
| 6        | 418       | H              | H              |
| 7        | 432       | H              | Me             |
| 8        | 446       | Me             | Me             |
| 9        | 460       | Et             | Me             |

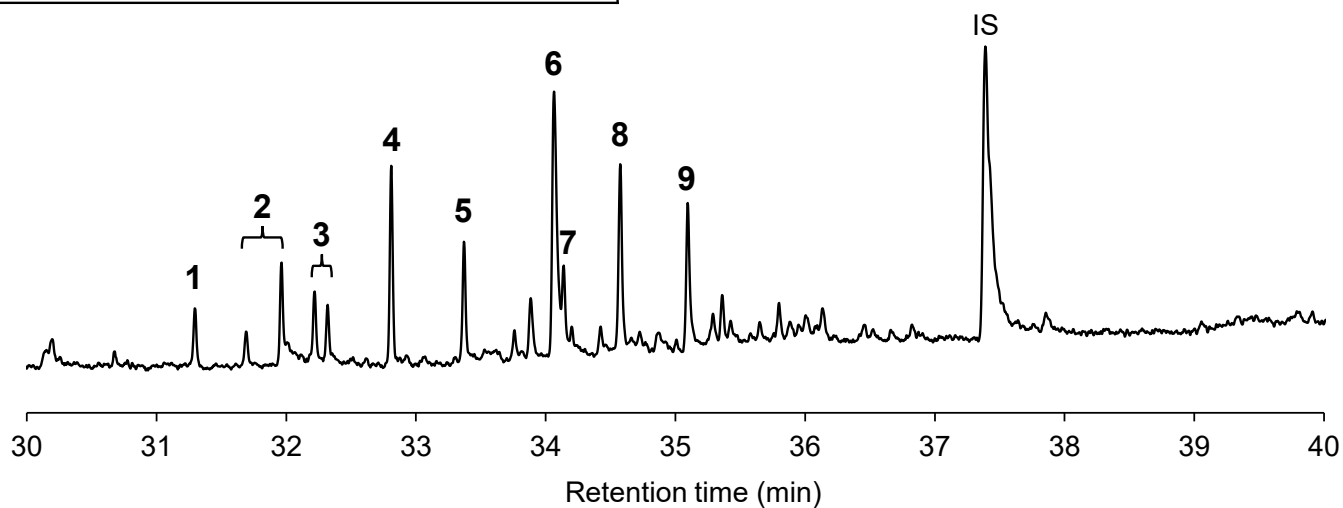

**Fig. S10** Assignment of dimeric products on the GC/MS total-ion chromatogram of EtOAc-soluble products after trimethylsilylation obtained from Japanese cedar wood (100 mg) in H<sub>2</sub>O (1 mL) under N<sub>2</sub> atmosphere (1 mL, prior to heating) over Pd/C (25 mg) at 350 °C for 5 min. Internal standard (IS): 1,3,5-triphenylbenzene.

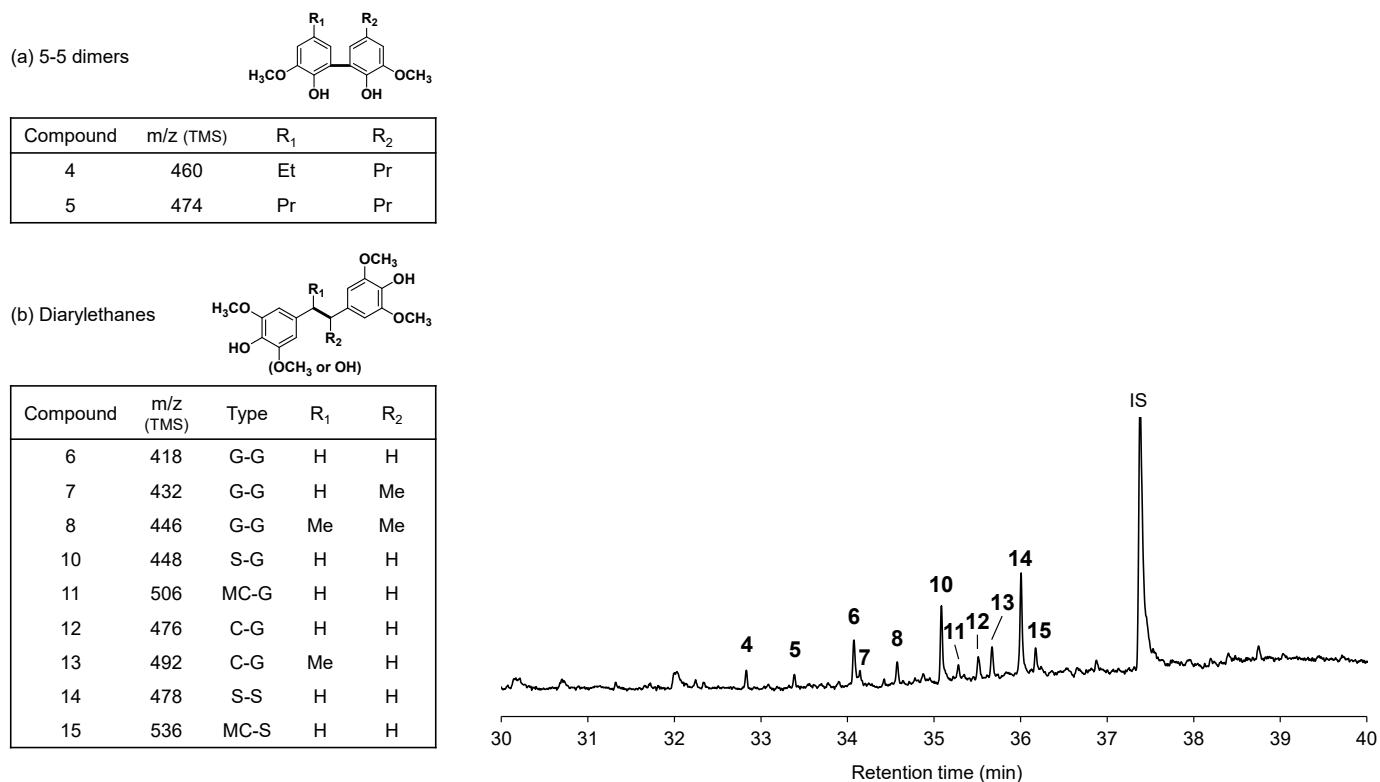

**Fig. S11** Assignment of dimeric products on the GC/MS total-ion chromatogram of EtOAc-soluble products after trimethylsilylation obtained from Japanese beech wood (100 mg) in H<sub>2</sub>O (1 mL) under N<sub>2</sub> atmosphere (1 mL, prior to heating) over Pd/C (25 mg) at 350 °C for 5 min. Internal standard (IS): 1,3,5-triphenylbenzene.

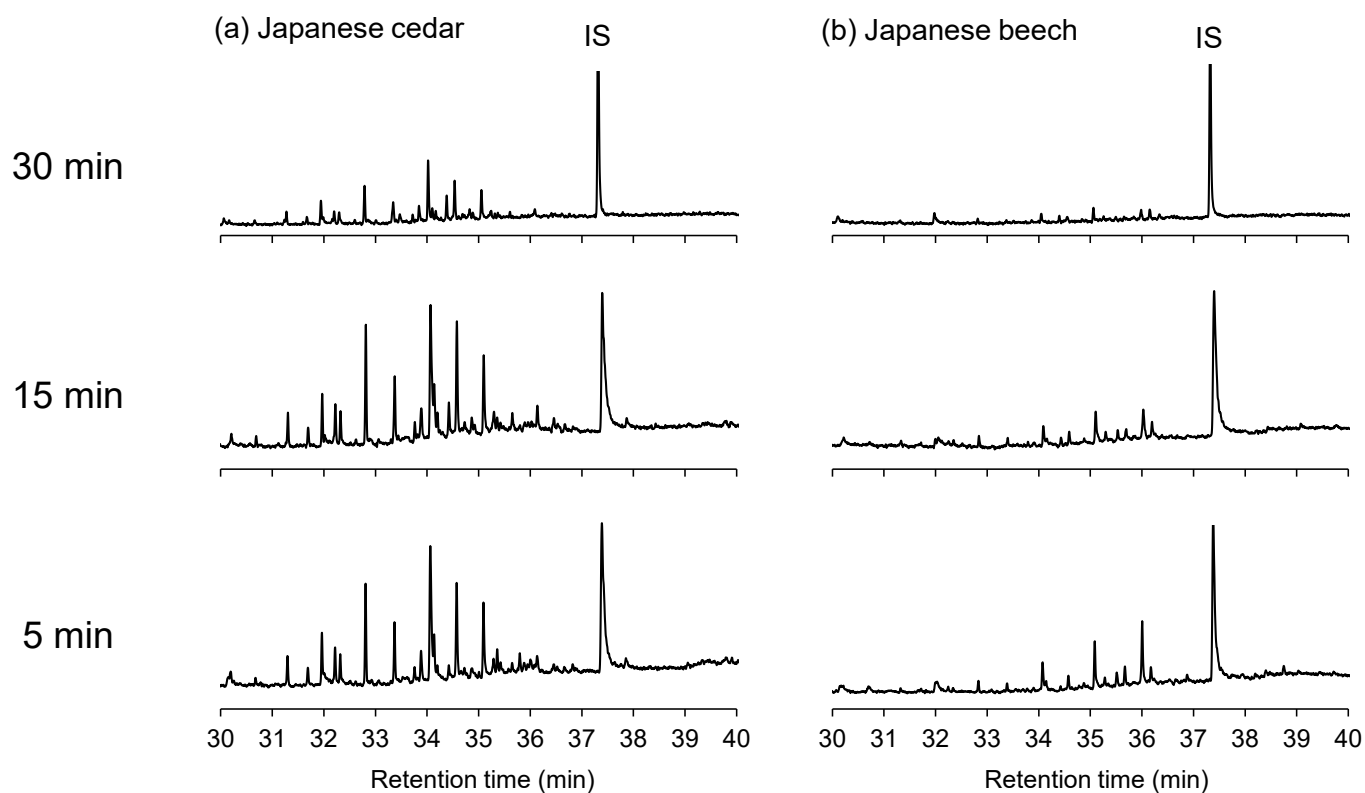

**Fig. S12** Assignment of dimeric products on the GC/MS total-ion chromatograms of EtOAc-soluble products after trimethylsilylation obtained from (a) Japanese cedar wood (100 mg) and (b) Japanese beech wood in H<sub>2</sub>O (1 mL) under N<sub>2</sub> atmosphere (1 mL, prior to heating) over Pd/C (25 mg) at 350 °C for 5, 15 and 30 min. Internal standard (IS): 1,3,5-triphenylbenzene.

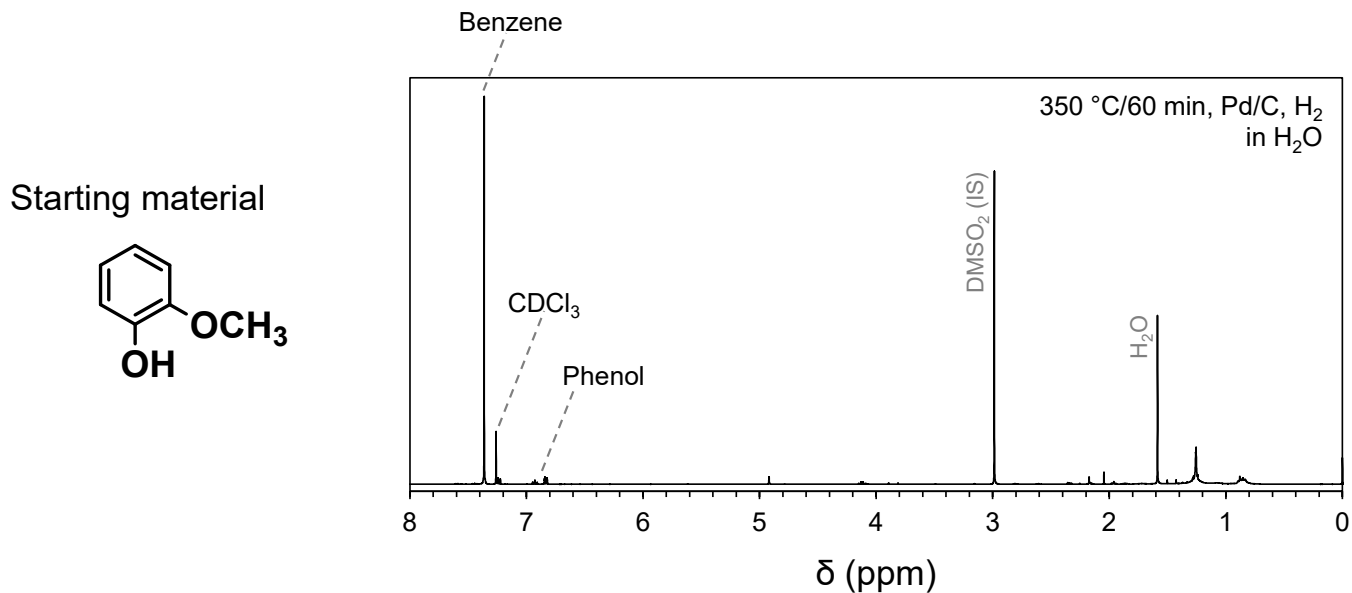

**Fig. S13** <sup>1</sup>H-NMR spectrum (400 MHz) of CDCl<sub>3</sub>-soluble products obtained from guaiacol (20 mg) over Pd/C (20 mg) in H<sub>2</sub>O (1 mL) under N<sub>2</sub> atmosphere (1 atm, prior to heating) at 350 °C for 60 min. Internal standard (IS): dimethyl sulfone (DMSO<sub>2</sub>, 1.50 mg).

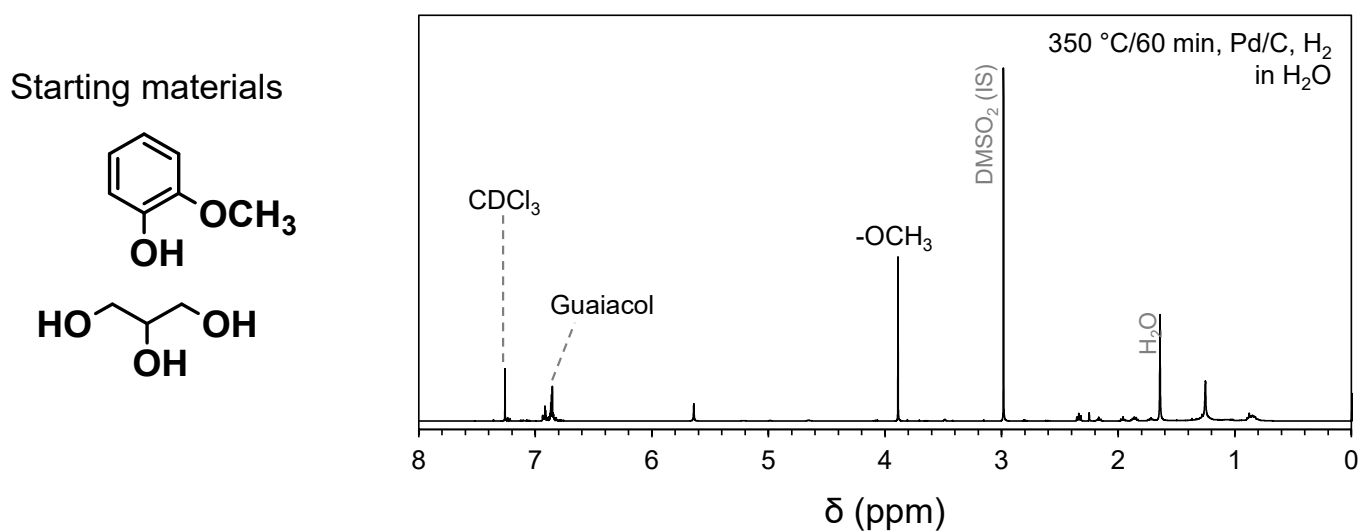

**Fig. S14** <sup>1</sup>H-NMR spectrum (400 MHz) of CDCl<sub>3</sub>-soluble products obtained from a mixture of guaiacol (20 mg) and glycerol (20 mg) over Pd/C (20 mg) in H<sub>2</sub>O (1 mL) under N<sub>2</sub> atmosphere (1 atm, prior to heating) at 350 °C for 60 min. Internal standard (IS): dimethyl sulfone (DMSO<sub>2</sub>, 1.72 mg).

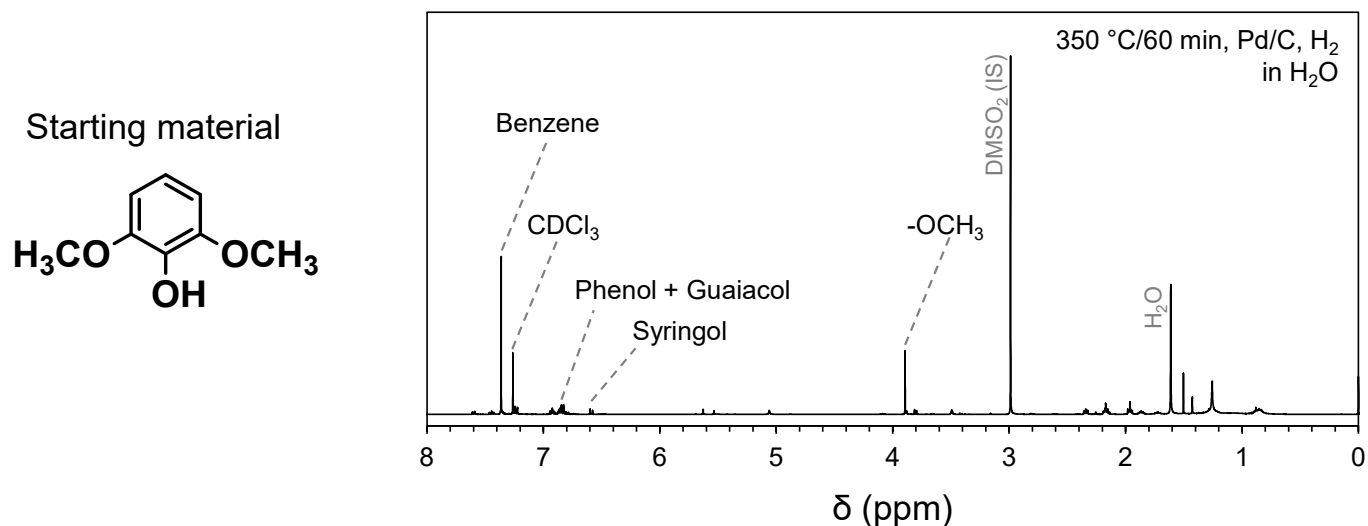

**Fig. S15** <sup>1</sup>H-NMR spectrum (400 MHz) of CDCl<sub>3</sub>-soluble products obtained from syringol (20 mg) over Pd/C (20 mg) in H<sub>2</sub>O (1 mL) under N<sub>2</sub> atmosphere (1 atm, prior to heating) at 350 °C for 60 min. Internal standard (IS): dimethyl sulfone (DMSO<sub>2</sub>, 1.70 mg).

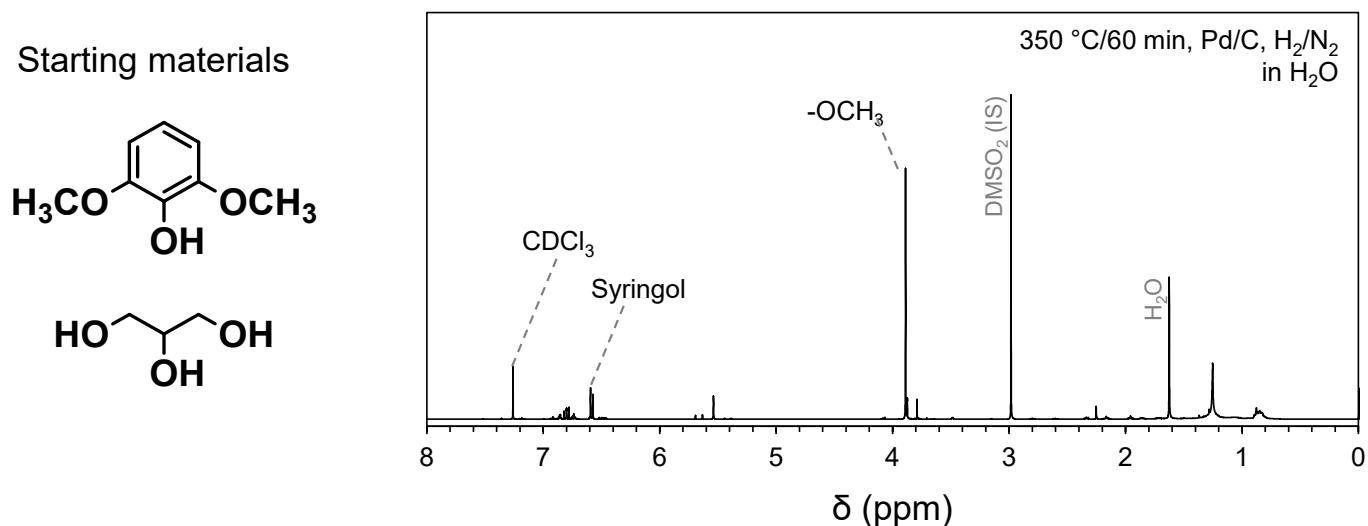

**Fig. S16** <sup>1</sup>H-NMR spectrum (400 MHz) of CDCl<sub>3</sub>-soluble products obtained from a mixture of syringol (20 mg) and glycerol (20 mg) over Pd/C (20 mg) in H<sub>2</sub>O (1 mL) under N<sub>2</sub> atmosphere (1 atm, prior to heating) at 350 °C for 60 min. Internal standard (IS): dimethyl sulfone (DMSO<sub>2</sub>, 1.72 mg).

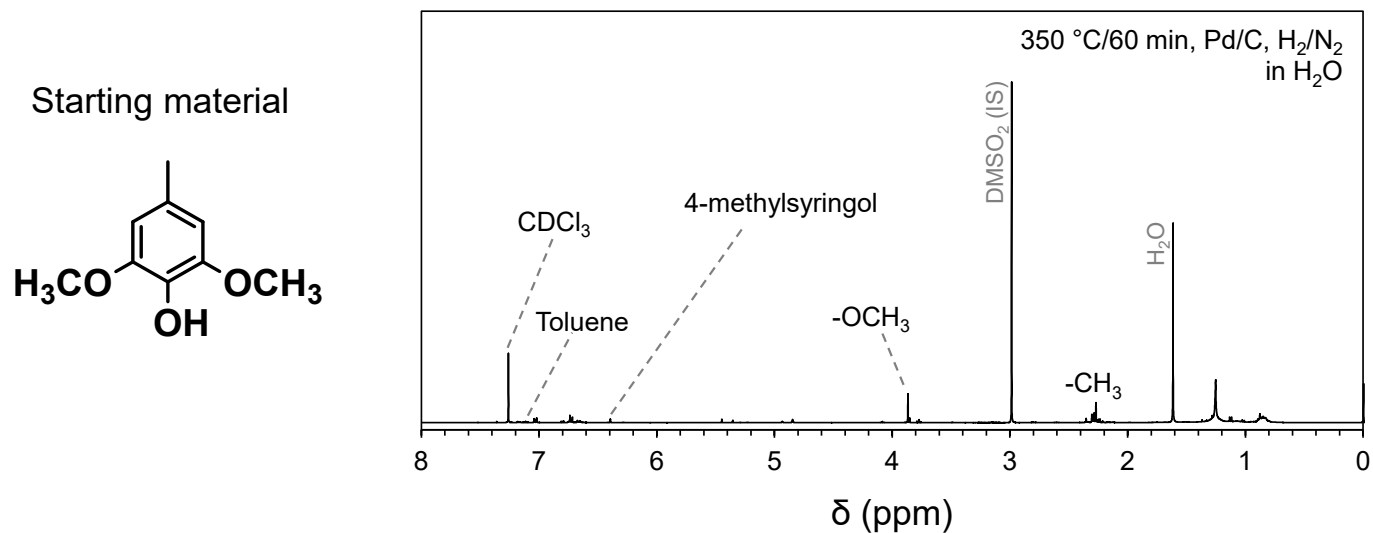

**Fig. S17** <sup>1</sup>H-NMR spectrum (400 MHz) of CDCl<sub>3</sub>-soluble products obtained from 4-Methylsyngingol (20 mg) over Pd/C (20 mg) in H<sub>2</sub>O (1 mL) under N<sub>2</sub> atmosphere (1 atm, prior to heating) at 350 °C for 60 min. Internal standard (IS): dimethyl sulfone (DMSO<sub>2</sub>, 1.22 mg).

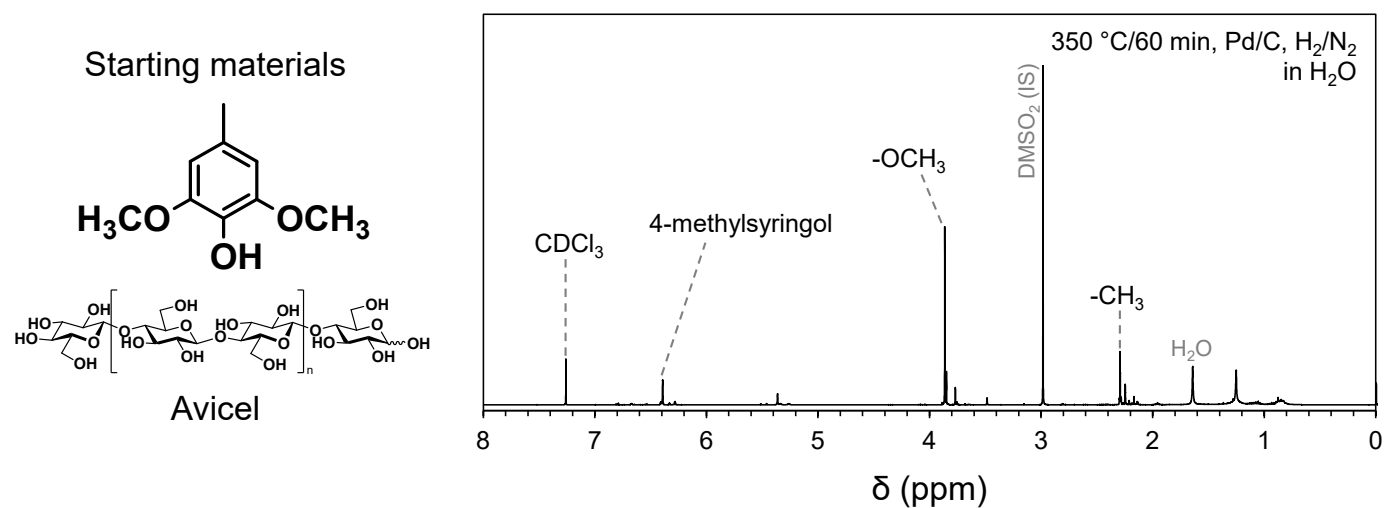

**Fig. S18** <sup>1</sup>H-NMR spectrum (400 MHz) of CDCl<sub>3</sub>-soluble products obtained from a mixture of 4-Methylsyngingol (20 mg) and Avicel (20 mg) over Pd/C (20 mg) in H<sub>2</sub>O (1 mL) under N<sub>2</sub> atmosphere (1 atm, prior to heating) at 350 °C for 60 min. Internal standard (IS): dimethyl sulfone (DMSO<sub>2</sub>, 1.93 mg).

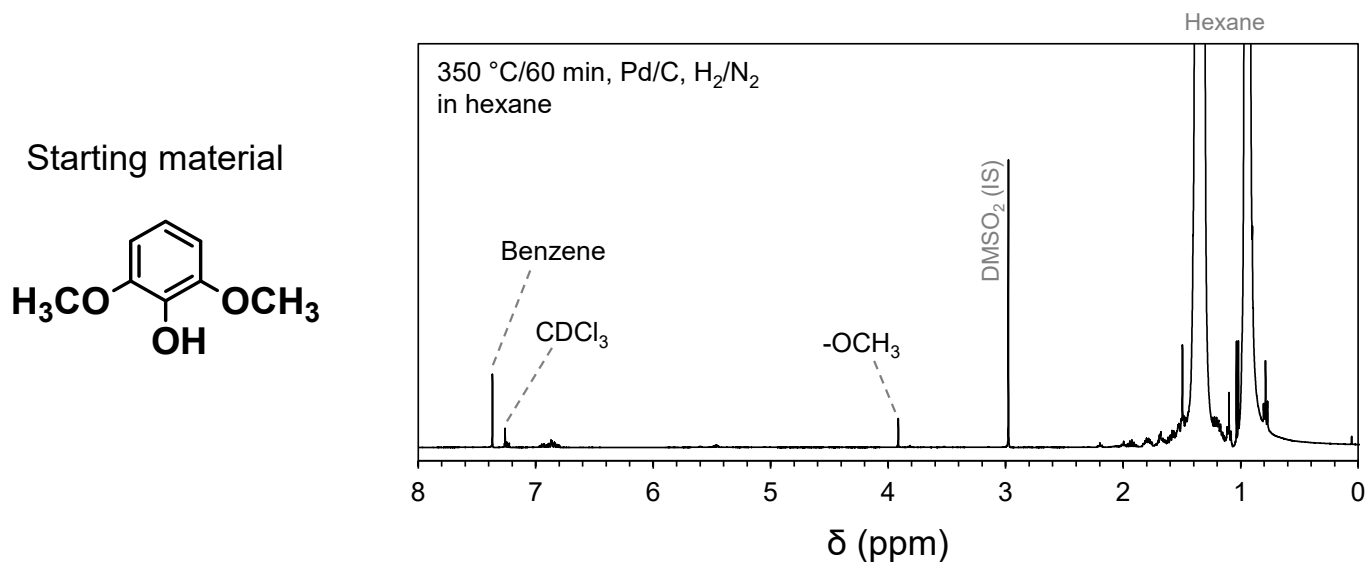

**Fig. S19** <sup>1</sup>H-NMR spectrum (400 MHz) of CDCl<sub>3</sub>-soluble products obtained from syringol (20 mg) over Pd/C (20 mg) in hexane (1 mL) under a H<sub>2</sub>:N<sub>2</sub> atmosphere (1 atm, 1:1 v/v, prior to heating) at 350 °C for 60 min. Internal standard (IS): dimethyl sulfone (DMSO<sub>2</sub>, 1.50 mg).

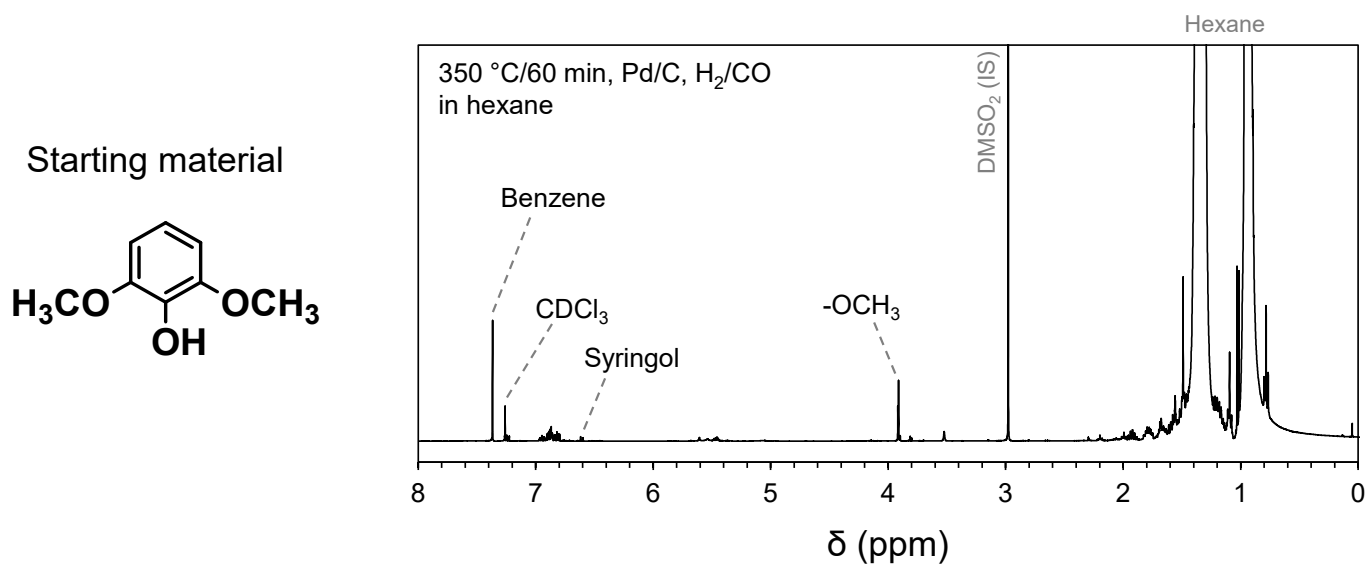

**Fig. S20** <sup>1</sup>H-NMR spectrum (400 MHz) of CDCl<sub>3</sub>-soluble products obtained from syringol (20 mg) over Pd/C (20 mg) in hexane (1 mL) under a H<sub>2</sub>:CO atmosphere (1 atm, 1:1 v/v, prior to heating) at 350 °C for 60 min. Internal standard (IS): dimethyl sulfone (DMSO<sub>2</sub>, 1.46 mg).

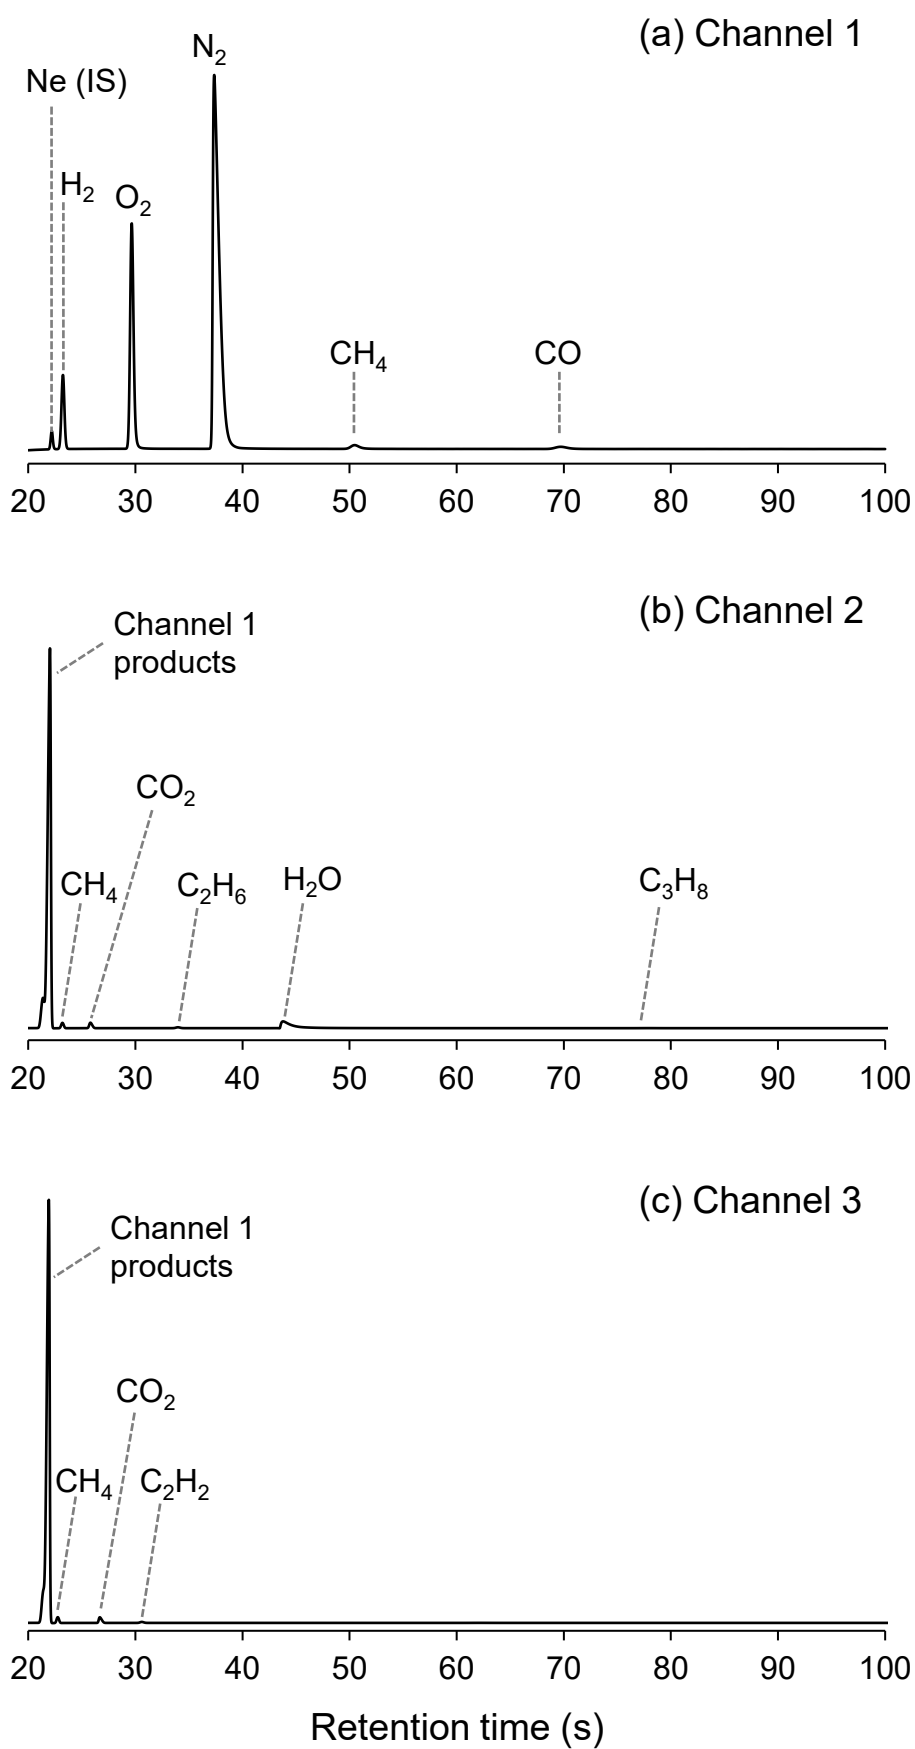

**Fig. S21** Representative GC chromatograms of gaseous products obtained from Japanese beech wood (100 mg) in H<sub>2</sub>O (1 mL) under N<sub>2</sub> atmosphere (1 mL, prior to heating) over Pd/C (25 mg) at 350 °C for 60 min. Internal standard (IS): Ne (5 mL, 25 °C, 0.1 MPa).

**Table S2** Single-point response factors obtained during Micro GC calibration

| Standard                          | Channel # | Response factor<br>(relative to Ne) | Correction factor<br>(relative to N <sub>2</sub> in air) |
|-----------------------------------|-----------|-------------------------------------|----------------------------------------------------------|
| Ne                                | 1         | 1.0                                 | -                                                        |
| H <sub>2</sub>                    | 1         | 3.65                                | -                                                        |
| O <sub>2</sub>                    | 1         | 0.662                               | 0.33426                                                  |
| N <sub>2</sub>                    | 1         | -                                   | 1.0                                                      |
| CH <sub>4</sub>                   | 1         | 1.33                                | -                                                        |
| CO                                | 1         | 0.47                                | -                                                        |
| CO <sub>2</sub>                   | 2         | 3.5                                 | 0.019                                                    |
| C <sub>2</sub> H <sub>n</sub> (*) | 2, 3      | 9.44                                | -                                                        |
| C <sub>2</sub> H <sub>6</sub>     | 2         | 11.2                                | -                                                        |
| C <sub>3</sub> H <sub>6</sub>     | 2         | 7.75                                | -                                                        |
| C <sub>3</sub> H <sub>8</sub>     | 2         | 9.26                                | -                                                        |

\*: includes both C<sub>2</sub>H<sub>2</sub> and C<sub>2</sub>H<sub>4</sub>.

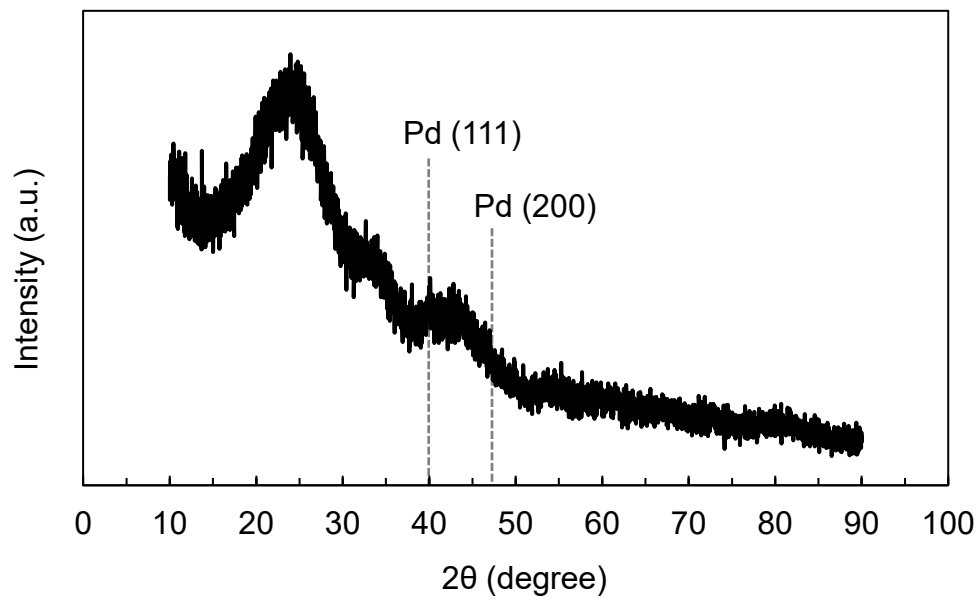

**Fig. S22** XRD pattern of the 5% Pd/C catalyst used in the present study.

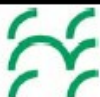

April 19 2024

**NACALAI TESQUE, INC.**

Kyoto Factory

17 Ishibashi, Kaide-cho,  
Muko, Kyoto 617-0004  
TEL : +81- (0) 75-251-1730

Product number    Grade    Lot number    Package size  
25910-36    EP    V4F5246    10G

Product name  
Palladium Carbon

| Test Item      | Unit | Specification | Result |
|----------------|------|---------------|--------|
| Loss on drying | %    | max. 10.0     | 0.5    |
| Assay (Pd)     | %    | 4.0 - 5.5     | 5.0    |

Remarks

*k. Goya*

SIGNATURE

**Fig. S23** Composition of the Pd/C catalyst as informed by the manufacturer.
